# Supplementary material for: Promiscuous recognition of MR1 drives self-reactive mucosal-associated invariant T cell responses
Source: PubMed Central journal article supplement — J Exp Med. 2023 Jun 29;220(9):e20221939. doi: 10.1084/jem.20221939 (PMC10309188; doi:10.1084/jem.20221939), 2023-06-29
Supplement: JEM_20221939_SourceDataF1.pdf [file JEM_20221939_SourceDataF1.pdf]

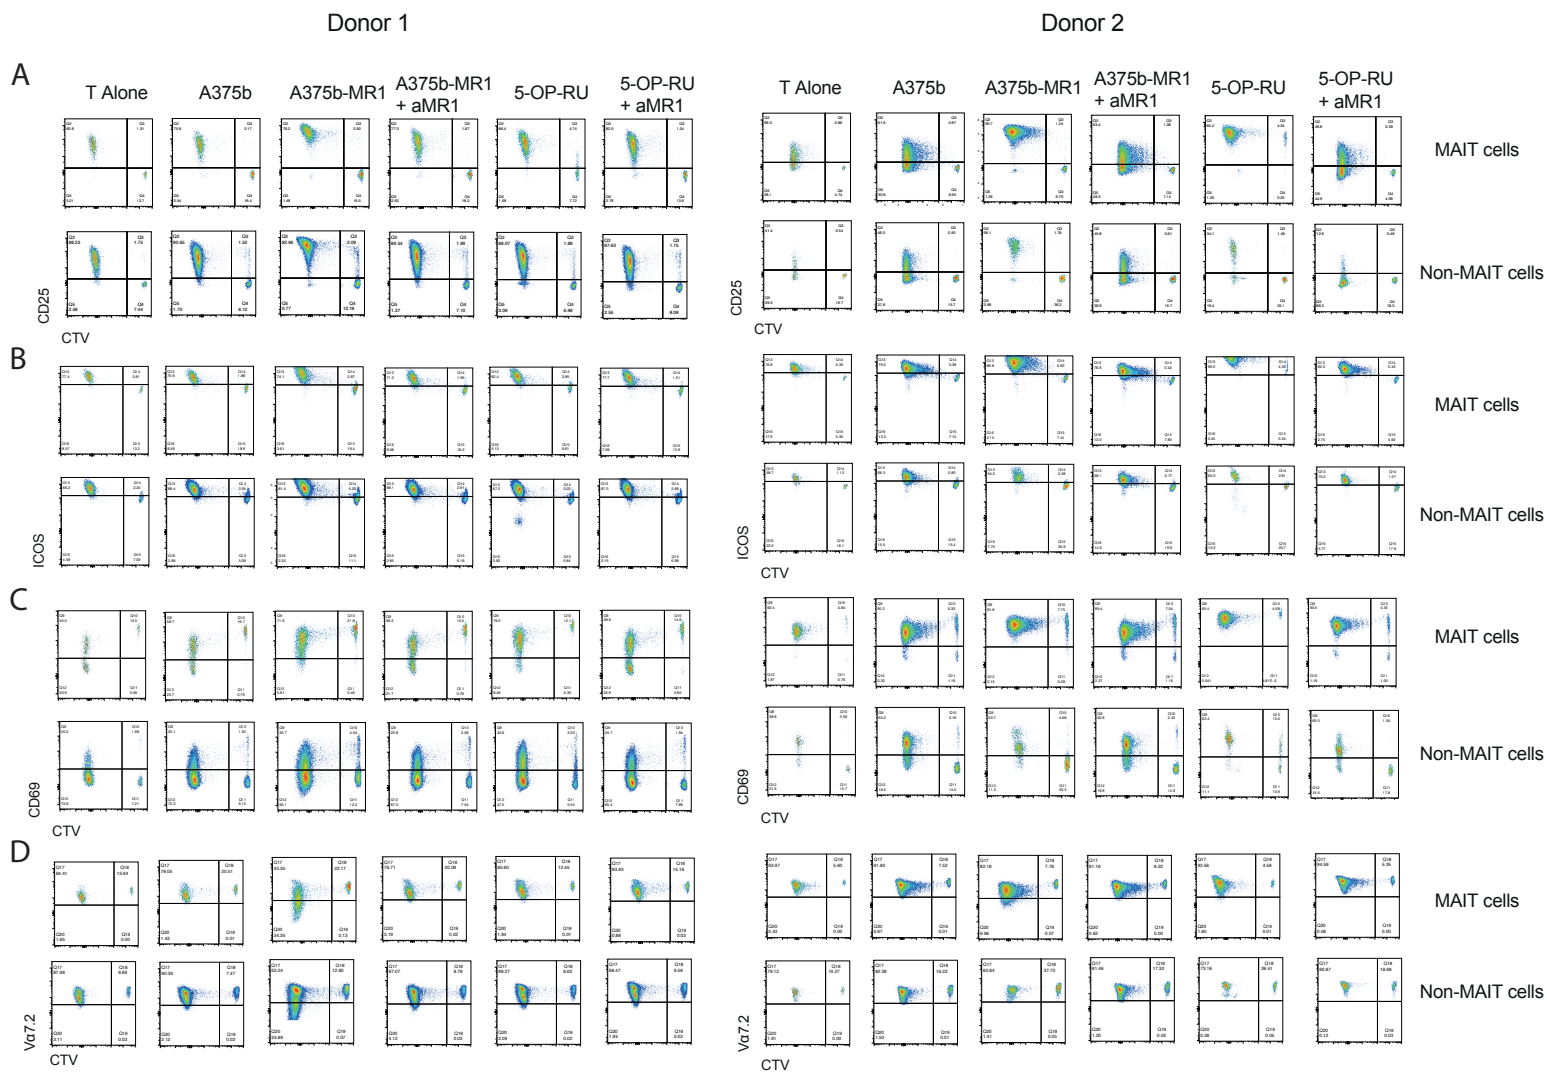

Original plots from Donor 1 and 2 used for determining the MFI used in Figure 1C. Plots show the activation markers A) CD25 B) ICOS C) CD69 D) Va7.2 each plotted against CTV for each condition used in the assay.

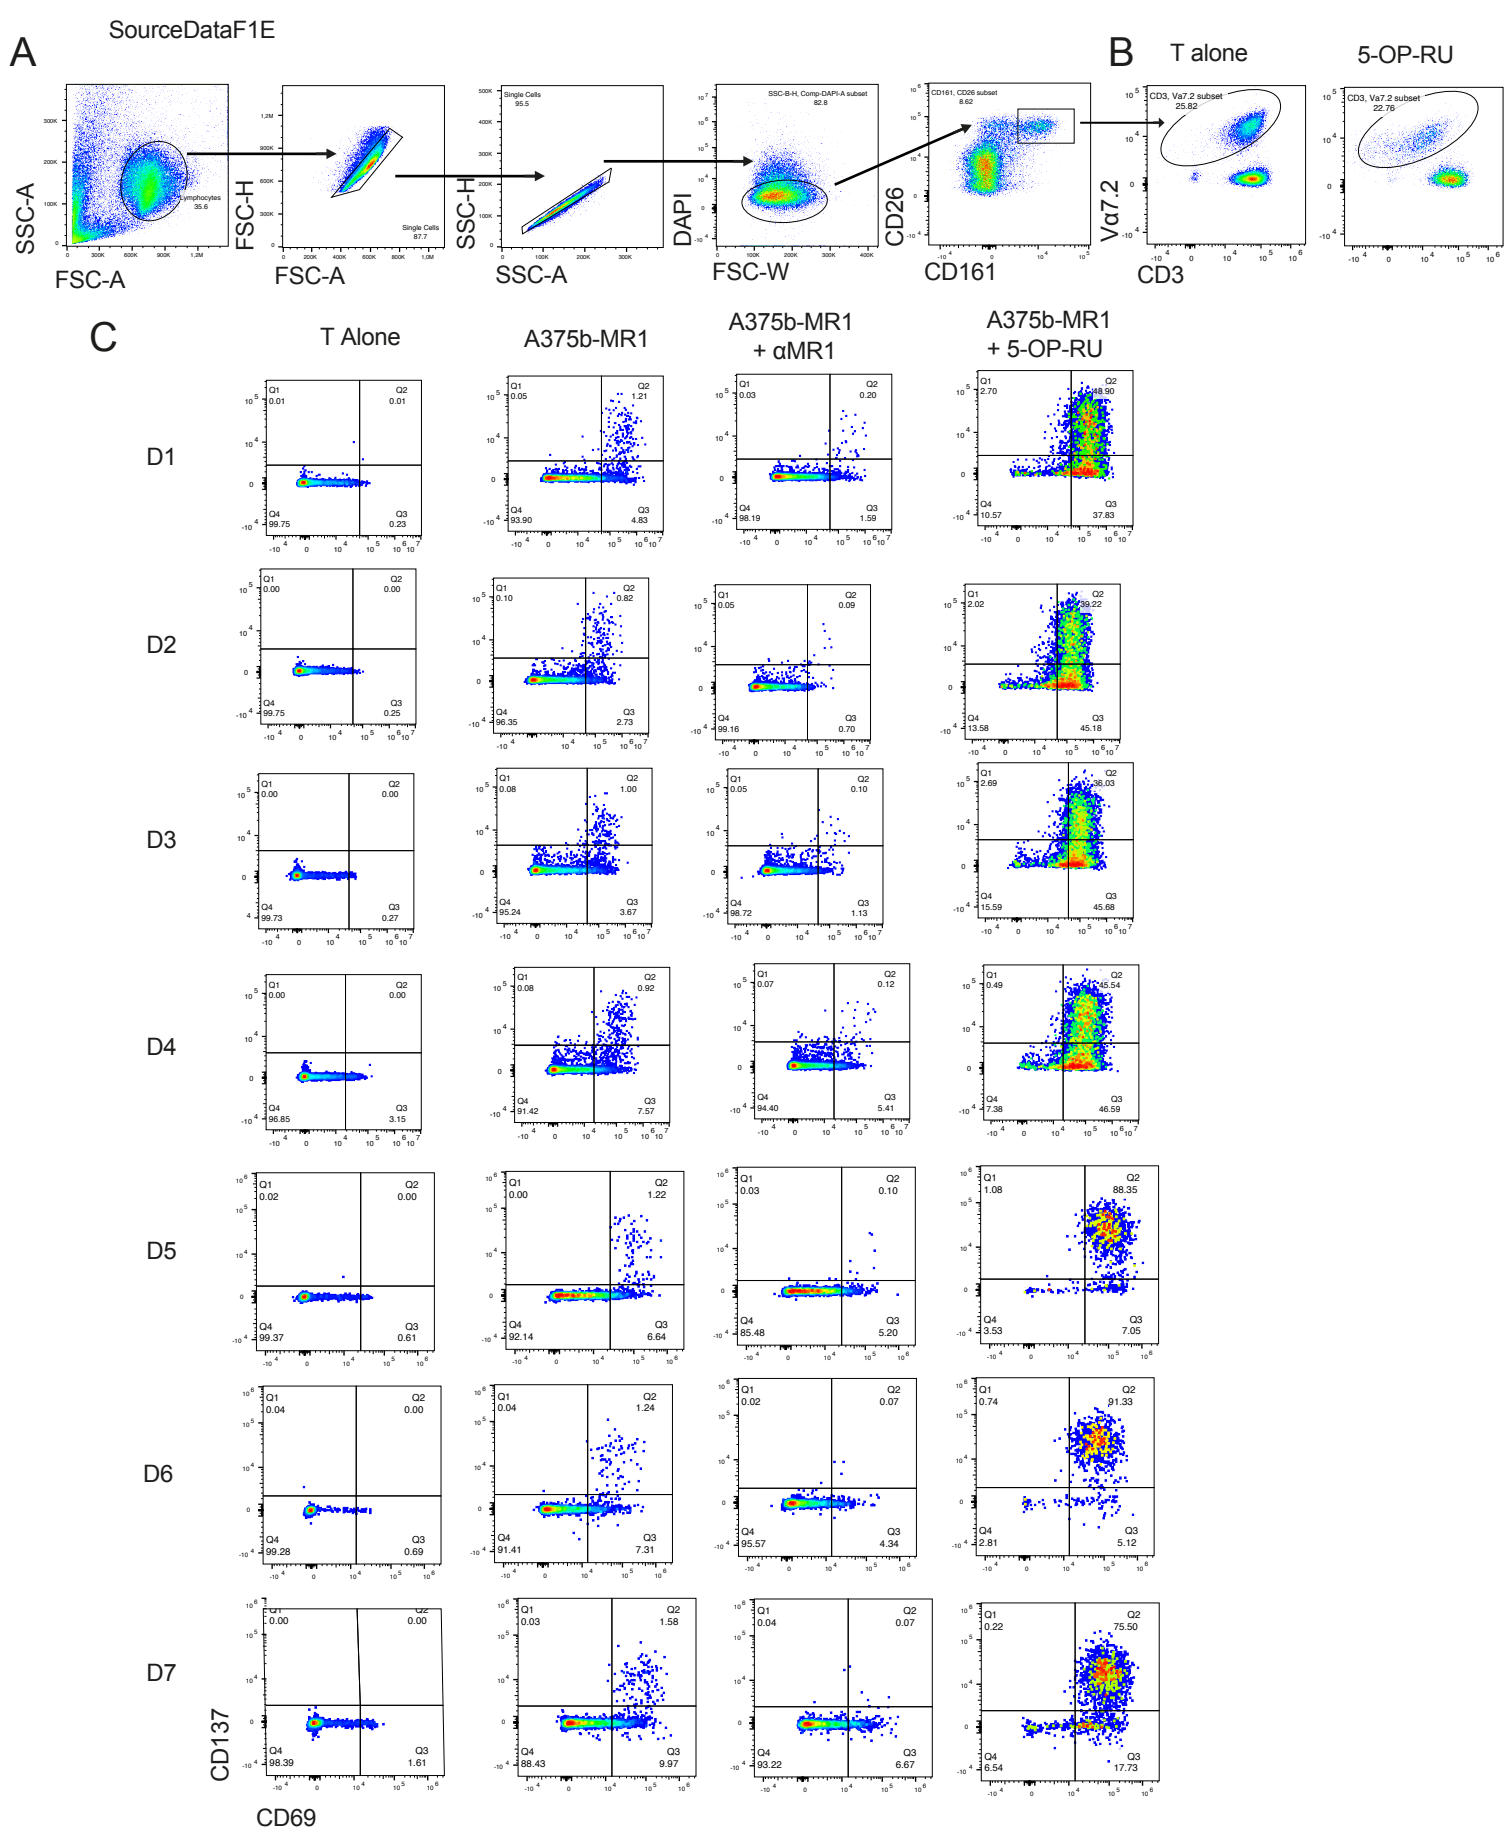

A) The gating used to identify MAIT cells within negatively enriched CD3<sup>+</sup> cells from each of 7 healthy donors. B) Gating of Va7.2<sup>+</sup>/CD3<sup>+</sup> alone and after stimulation with 5-OP-RU. MAIT cells can be positively detected using these markers despite their downregulation after TCR mediated stimulation. C) Original plots of MAIT cells showing the expression of CD137<sup>+</sup>/CD69<sup>+</sup> events. Only double positive events were used for data relating to Fig. 1G.

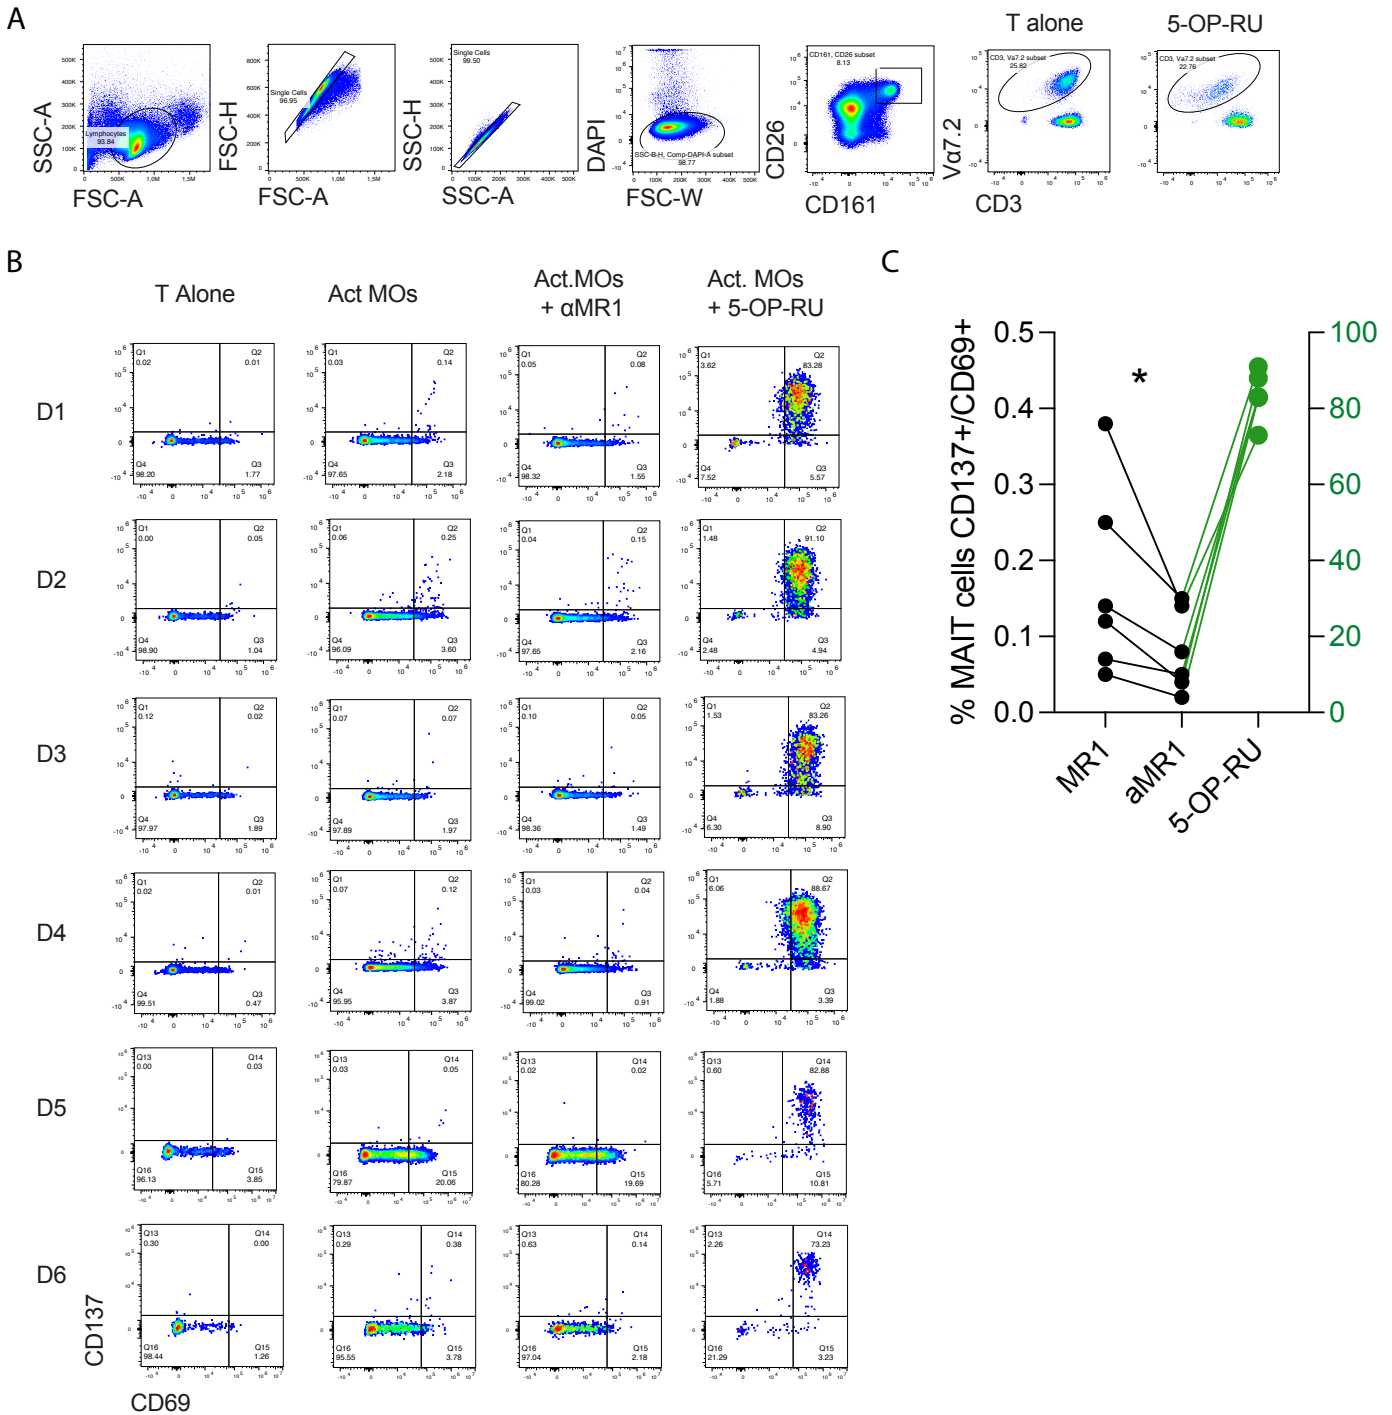

A) The gating used to identify MAIT cells within negatively enriched CD3<sup>+</sup> cells from each of 6 healthy donors. Va7.2 vs CD3 staining is shown in T Alone condition and after stimulation with 5-OP-RU to demonstrate the loss of Va7.2 and CD3 but maintain their positive detection with these markers. B) Original plots of MAIT cells showing the expression of the activation markers CD137 and CD69. Only double positive events were used for data relating to Fig. 1H. C) Percentage of CD69<sup>+</sup>/CD137<sup>+</sup> MAIT cells after stimulation with activated monocytes with or without aMR1 mAbs.
