# Supplementary material for: Promiscuous recognition of MR1 drives self-reactive mucosal-associated invariant T cell responses
Source: PubMed Central journal article supplement — J Exp Med. 2023 Jun 29;220(9):e20221939. doi: 10.1084/jem.20221939 (PMC10309188; doi:10.1084/jem.20221939), 2023-06-29
Supplement: JEM_20221939_SourceDataF3.pdf [file JEM_20221939_SourceDataF3.pdf]

A

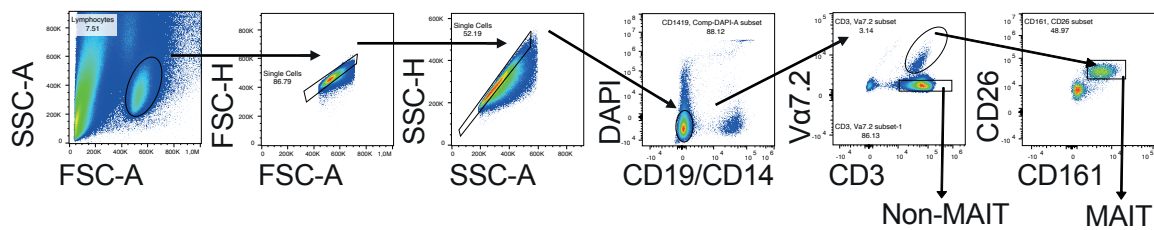

B

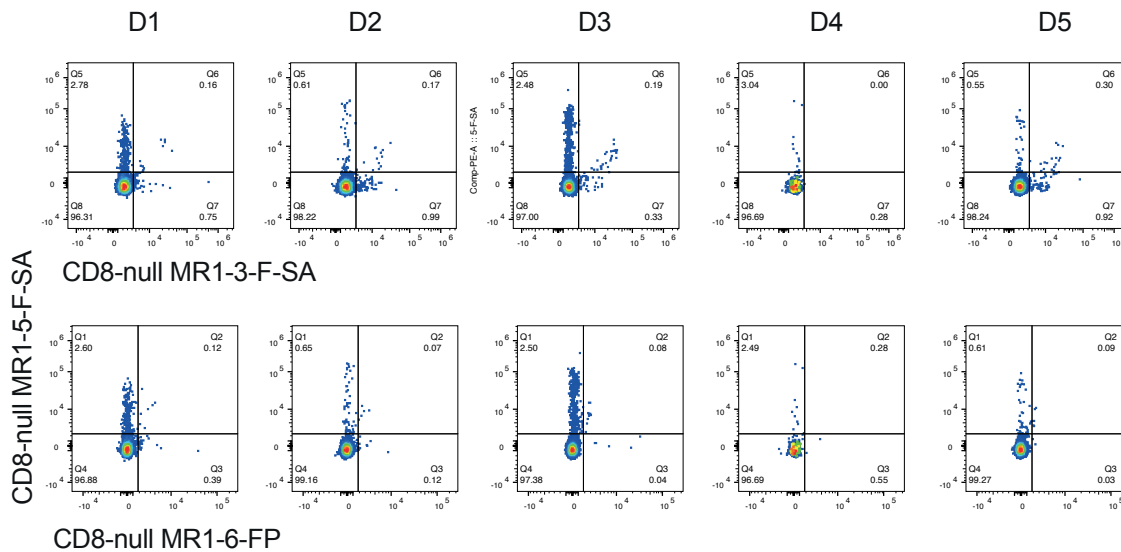

C

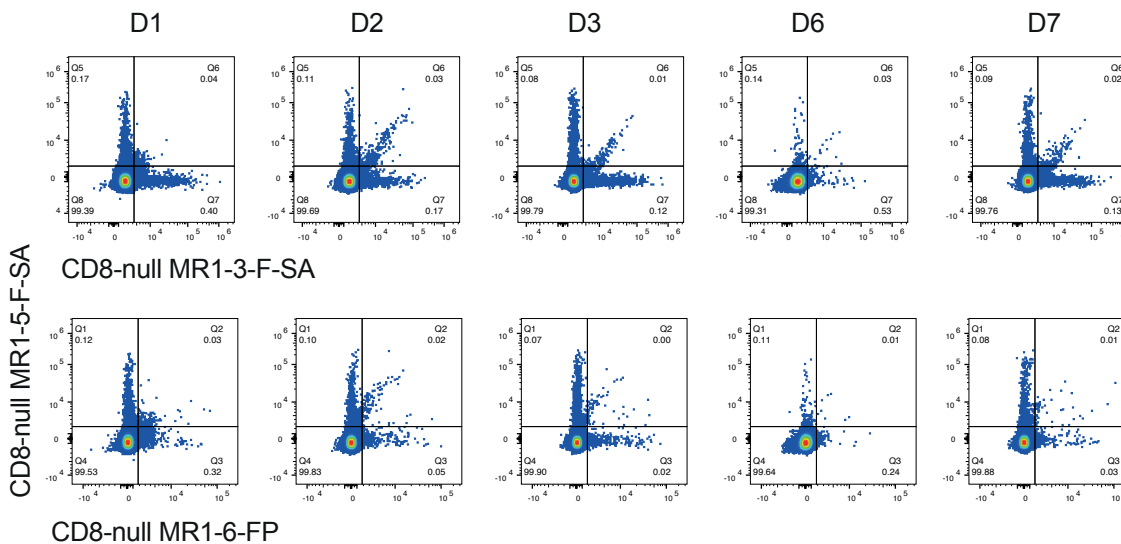

A) Gating strategy for the identification of tetramer positive MAIT cells and tetramer positive non-MAIT cells within PBMCs from 7 healthy donors. B) Plots of each donor showing staining of MAIT cells with all three tetramers each loaded with different ligands. Plots display either 5-F-SA vs 3-F-SA or 5-F-SA vs 6-FP tetramers. Tetramers used in this experiment generated from CD8-null MR1 monomers loaded with the indicated ligands. C) The same tetramer binding is shown in B, performed on non-MAIT cells.
