# Supplementary material for: Promiscuous recognition of MR1 drives self-reactive mucosal-associated invariant T cell responses
Source: PubMed Central journal article supplement — J Exp Med. 2023 Jun 29;220(9):e20221939. doi: 10.1084/jem.20221939 (PMC10309188; doi:10.1084/jem.20221939), 2023-06-29
Supplement: JEM_20221939_SourceDataF4.pdf [file JEM_20221939_SourceDataF4.pdf]

## Experiment 1

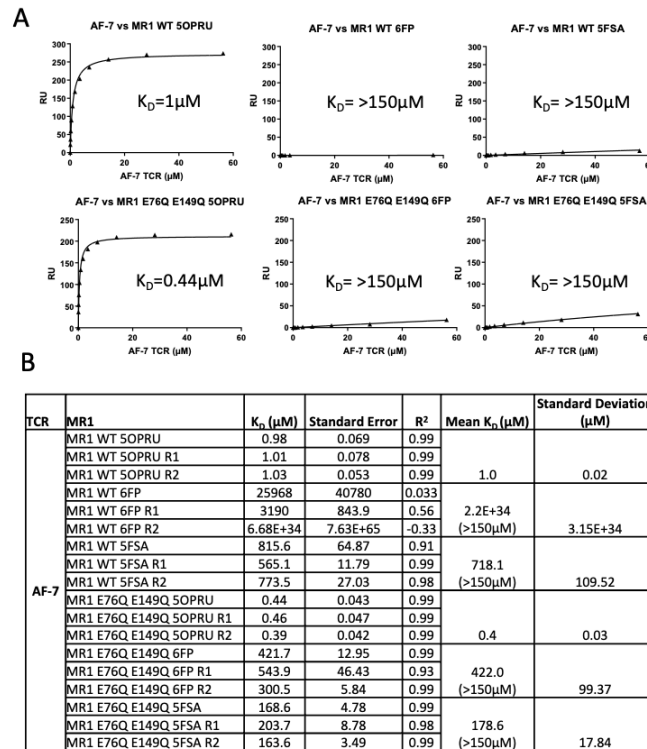

## Experiment 2

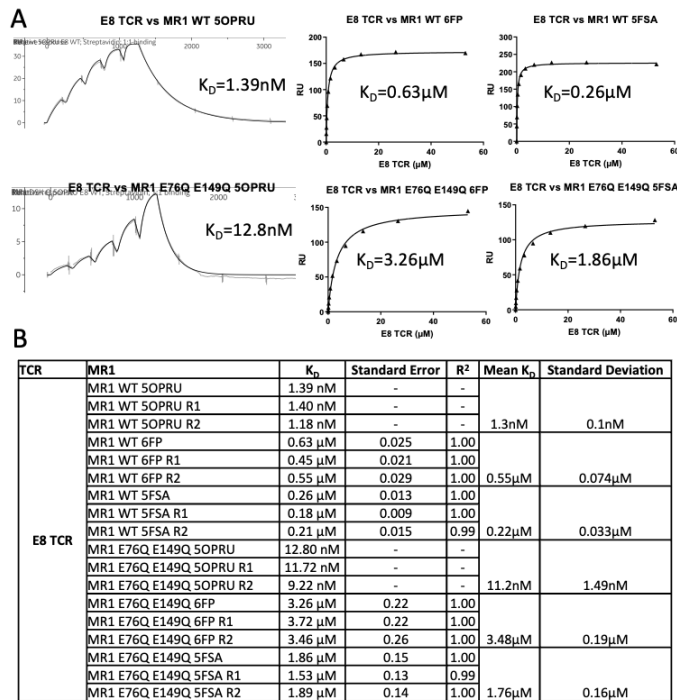

## Experiment 3

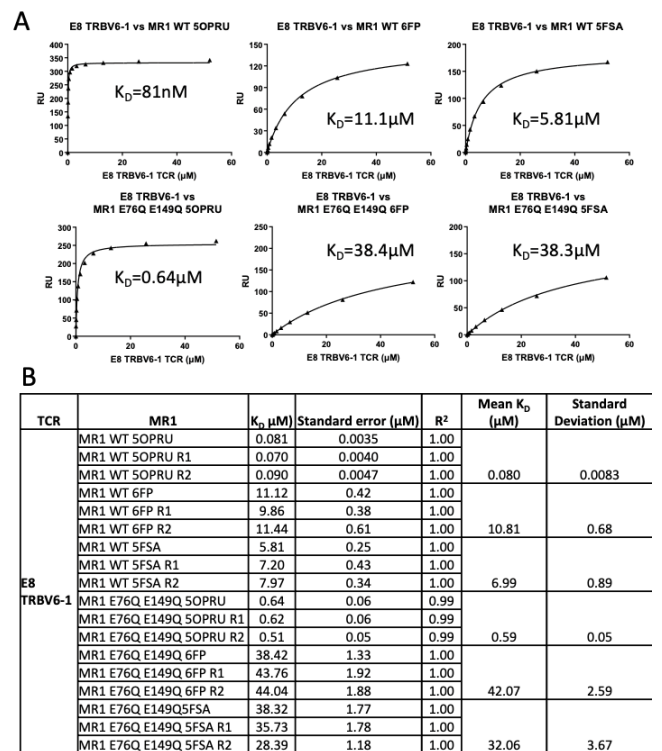

Triplicate Biacore data across 3 experiments for E8 TCR binding to MR1 loaded with 5-OP-RU, 6-FP and 5FSA and the salt bridge knockout mutant MR1 E76Q and E149Q also loaded with 5-OP-RU, 6-FP and 5FSA. A. Representative binding curve for each of the E8 TCR and MR1 interaction. B. Affinities. Calculations and plots were completed in GraphPad software. R squared is shown to demonstrate quality the fitting of the binding curve used to calculate the KD (1= perfect score). R next to the MR1-ligand indicates this is a repeat. Mean KD and Standard deviation calculated from the triplicate KDs.
